# Supplementary material for: Nucleosome occupancy as a novel chromatin parameter for replication origin functions
Source: HighWire-hosted journal article supplement (doi:10.1101/gr.209940.116), 2016-11-28
Supplement: Supplemental_Figure_Legends.docx [file Supplemental_Figure_Legends.docx]

**Supplemental Figure S1. The nucleosome signals in MNase-seq data are highly sensitive to the strength of MNase digestion.**  Top 2 panels show two independent histone H3 ChIP-seq data, demonstrating the reproducibility. The two MNase-seq data are from the same strain but with two different strengths of MNase digestion. Note that the nucleosome positions are reproducible between the two conditions, but the heights of nucleosome signals, especially around NDRs, are highly variable between the two conditions. All data are from ([McKnight et al. 2015](#_ENREF_24)).

**Supplemental Figure S2. Correlations between the changes in nucleosome positions and nucleosome occupancy around origins between G2/M and G1.** (A)The changes in nucleosome positions between G2/M and G1, as determined by Belsky et al. were compared to occupancy changes between G2/M and G1, demonstrating statistically significant correlations (p=0.016, χ2 test). (B) The average changes in nucleosome occupancy (G2/M-G1) were plotted for "downstream", "upstream" and "static" classes of origins ([Belsky et al. 2015](#_ENREF_5)).

**Supplemental Figure S3. Changes in nucleosome occupancy around origins are independent of MCM histone binding activity.**

A) Average H3 signals 1kb upstream and downstream of the ACS for all origins, ORC bound origins and ORC unbound origins. H3 signals from G1 are shown in blue and signals from G2/M are shown in red. The dotted lines represent the midpoint of the ACS. B) The difference in H3 from G2/M to G2 is graphed in orange for the corresponding origins. The WT plots are shown here again for the sake of comparison to the *mcm2-2A* mutant. C) Average H3 signals around origins for *mcm2-2A* in G1 and G2/M. D) The difference of average H3 in G2/M and G1 in orange.
