# Supplementary material for: Nucleosome occupancy as a novel chromatin parameter for replication origin functions
Source: HighWire-hosted journal article supplement (doi:10.1101/gr.209940.116), 2016-11-28
Supplement: Supplementtal_Table_S1.docx [file Supplementtal_Table_S1.docx]

**S1 Table. Summary of yeast strains used in this study**

| **Strain** | **Genotype** | **Source** |
| --- | --- | --- |
| W1588-4c | *MAT***a** *ade2-1 can1-100 his3-11,15 leu2-3,112 trp1-1 ura3-1 RAD5+* | (Thomas and Rothstein, 1989; Zhao *et al.* 1998) |
| YTT4709 | *Pol1-3FLAG-KanMX* | (Rodriguez and Tsukiyama, 2013) |
| YTT5095 | *Pol1-2L-3FLAG-KanMX* | (Rodriguez and Tsukiyama, 2013) |
| YTT6270 | *URA3::p306-BrdUinc* | This study |
| YTT6271 | *URA3::p306-BrdUinc* | This study |
| OAy661 | *Δbar1:hisG Δorc1:: hisG leu2::orc1-161 (LEU2)* | (Aparicio *et al.*, 1997) |
| YTT6290 | *Δbar1:hisG Δorc1:: hisG leu2::orc1-161 (LEU2) URA3::p306-BrdUinc* | This study |
| YTT6291 | *Δbar1:hisG Δorc1:: hisG leu2::orc1-161 (LEU2) URA3::p306-BrdUinc* | This study |
| YTT6269 | *Mcm2-AID::KanMX ura3-1:OSTIR1-9myc:URA3* | This study |
| YTT6266 | *Mcm2-AID::KanMX ura3-1:OSTIR1-9myc:URA3* | This study |
| YMP504-13 | *mcm2-Y82A-Y91A-9MYC (klTRP1)* | (Foltman *et al.*, 2013) |
| YMP514 | *mcm2-Y82A-Y91A::Hyg (hphNT)* | (Foltman *et al.*, 2013) |

*All strains are MATa and congenic to W303 with a correction for the weak *rad5* allele
